# Supplementary material for: Team Familiarity and Productivity in Cardiac Surgery Operations: The Effect of Dispersion, Bottlenecks, and Task Complexity
Source: Atypon-hosted journal article supplement (doi:10.1287/msom.2016.0597), 2016-12-19
Supplement: msom.2016.0597-sm.pdf [file msom.2016.0597-sm.pdf]

**Online Supplement:**

**“Team Familiarity and Productivity in Cardiac Surgery Operations: The Effect of Dispersion, Bottlenecks and Task Complexity”**

**Figure S1: Distribution of Bottleneck scores**

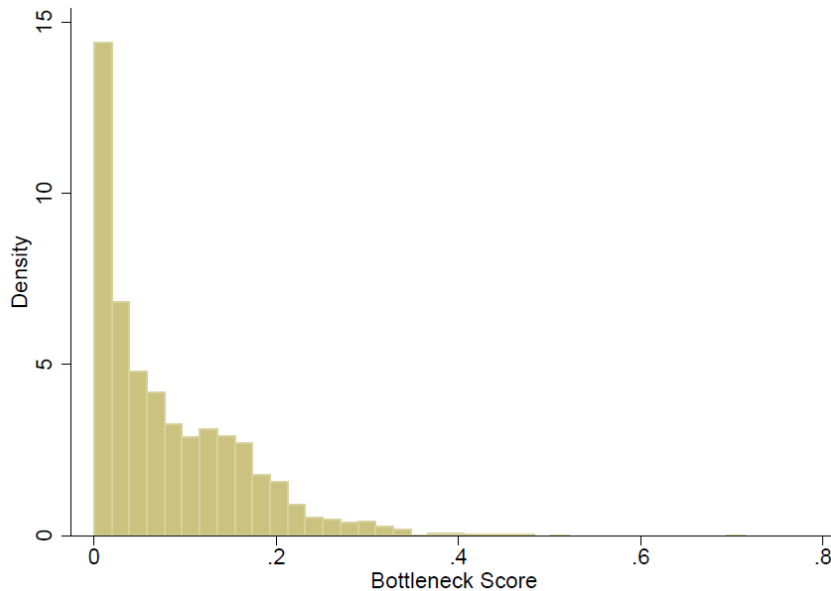

**Table S1. The number of surgeries by type in our sample**

|        | CABG | Valve Repair /Replacement | Congenital | Heart Failure | Tumor Removal | Routine | Other Normal | Double | Triple |
|--------|------|---------------------------|------------|---------------|---------------|---------|--------------|--------|--------|
| Mild   | 951  | 237                       | 41         | 0             | 8             | 96      | 20           | 0      | 0      |
| Medium | 2182 | 672                       | 40         | 14            | 10            | 89      | 34           | 0      | 0      |
| Severe | 140  | 415                       | 5          | 56            | 2             | 0       | 24           | 965    | 128    |
| Total  | 3273 | 1324                      | 86         | 70            | 20            | 185     | 78           | 965    | 128    |

**Additional tests for variable operationalization:** One potential issue with regards to our dependent variable is that shorter surgery durations might be argued to have a negative impact on the clinical outcome of the surgery. However, after interviewing hospital staff and analyzing our data, we have concluded that this is not the case. Specifically, there is no correlation between in-hospital mortality and the duration of the operation. Also, other than the clinical condition of the patient before the operation (i.e, severe), none of the variables have significant association with in-hospital mortality. In addition, we also investigate for any systematic statistical relationship between in-hospital mortality and our dependent (i.e. duration) and all independent and control variables (e.g., those at patient, surgeon, or team level). In order to examine this, we group our severe operations into two, those where in-hospital mortality occurred, and those where it did not. We then conduct a t-test to examine any potential relationship between in-hospital mortality and our independent and control variables. Our

results indicate that there is no statistical difference between these two groups (i.e., mortality vs non-mortality group) in terms of the averages of the variables of interest such as duration, familiarity, etc. Finally, we have also examined for any association between surgery durations and surgeon assignments. In order to check this, we grouped our surgeries into four categories according to their durations by using 25<sup>th</sup> percentile, the median, and 75<sup>th</sup> percentile as cut-offs, and then examined lead surgeons' assignments to these groups with a chi-square test. Our results indicate that they are evenly spread. Moreover, prior research has shown that shorter surgery durations can actually improve the quality of the operations outcome (Pisano et al. 2001) whereas longer surgical durations have been associated with higher probabilities of a surgical site infection (SSI) in several surgery types including cardiac operations (Gaynes et al. 2001, Gibbons et al. 2011). As a result, in contrast to the argument suggesting that shorter surgery durations may be associated with worse clinical outcomes; previous research suggests that they are actually associated with better clinical outcomes.

**Table S2. Regression of Team Familiarity on Surgery Duration using Range for Team Familiarity Dispersion**

| Variable                             | Duration                |                         |
|--------------------------------------|-------------------------|-------------------------|
|                                      | Model: (1)              | (2)                     |
| Team Familiarity Dispersion          | 0.00003**<br>(0.00001)  | 0.00003**<br>(0.00001)  |
| Bottleneck-Pair                      | 0.01507**<br>(0.00340)  | 0.01538**<br>(0.00341)  |
| Severe Familiarity Percentage        | -0.40677**<br>(0.11473) | -0.40508**<br>(0.11586) |
| Average Team Familiarity             | -0.03214*<br>(0.01290)  | -0.02885*<br>(0.01283)  |
| Average Team Familiarity x Severe    |                         | -0.02898*<br>(0.01239)  |
| Individual Average Direct Experience | -0.05512**<br>(0.01394) | -0.05604**<br>(0.01392) |
| Team Size                            | 0.04075**<br>(0.00641)  | 0.04160**<br>(0.00643)  |
| Severe                               | 0.02479+<br>(0.01430)   | 0.16449**<br>(0.06001)  |
| Mild                                 | -0.01156+<br>(0.00599)  | -0.01121+<br>(0.00599)  |
| Constant                             | 5.81310**<br>(0.08224)  | 5.30034**<br>(0.08243)  |
| Observations (N)                     | 6129                    | 6129                    |
| Adjusted R <sup>2</sup>              | 0.478                   | 0.479                   |
| BIC                                  | -1521.933               | -1525.260               |
| AIC                                  | -1730.348               | -1740.398               |
| Quarter Fixed Effect                 | Yes                     | Yes                     |

|                              |     |     |
|------------------------------|-----|-----|
| Lead Surgeon Fixed Effect    | Yes | Yes |
| Procedure Fixed Effect       | Yes | Yes |
| Day of the Week Fixed Effect | Yes | Yes |

+, \* and \*\* denote significance at 10%, 5% and 1% levels respectively

**Table S3. Regression of Team Familiarity on Surgery Duration using Coefficient of Variation for Team Familiarity Dispersion**

| Variable                             | Duration              |                       |
|--------------------------------------|-----------------------|-----------------------|
|                                      | Model: (1)            | (2)                   |
| Team Familiarity Dispersion          | 0.4047**<br>(0.0750)  | 0.3971**<br>(0.0748)  |
| Bottleneck-Pair                      | 0.0167**<br>(0.0034)  | 0.0170**<br>(0.0034)  |
| Severe Familiarity Percentage        | -0.4566**<br>(0.1167) | -0.4538**<br>(0.1176) |
| Average Team Familiarity             | -0.0566**<br>(0.0144) | -0.0529**<br>(0.0143) |
| Average Team Familiarity x Severe    |                       | -0.0270*<br>(0.0123)  |
| Individual Average Direct Experience | -0.0249*<br>(0.0112)  | -0.0265*<br>(0.0112)  |
| Team Size                            | 0.0512**<br>(0.0068)  | 0.0518**<br>(0.0069)  |
| Severe                               | 0.0230*<br>(0.0098)   | 0.1534*<br>(0.0597)   |
| Mild                                 | -0.0112+<br>(0.0060)  | -0.0108+<br>(0.0060)  |
| Constant                             | 5.1534**<br>(0.0902)  | 5.1396**<br>(0.0904)  |
| Observations (N)                     | 6129                  | 6129                  |
| Adjusted R <sup>2</sup>              | 0.481                 | 0.482                 |
| BIC                                  | -1556.211             | -1558.024             |
| AIC                                  | -1764.626             | -1773.163             |
| Quarter Fixed Effect                 | Yes                   | Yes                   |
| Lead Surgeon Fixed Effect            | Yes                   | Yes                   |
| Procedure Fixed Effect               | Yes                   | Yes                   |
| Day of the Week Fixed Effect         | Yes                   | Yes                   |

+, \* and \*\* denote significance at 10%, 5% and 1% levels respectively

**Table S4. Regression of Team Familiarity on Surgery Duration using three dummy variables for Bottleneck-Pair**

| Variable | Duration |
|----------|----------|
|----------|----------|

|                                      | Model: (1)            | (2)                   |
|--------------------------------------|-----------------------|-----------------------|
| Team Familiarity Dispersion          | 0.0002**<br>(0.0000)  | 0.0002**<br>(0.0000)  |
| 25th Dummy                           | 0.0565**<br>(0.0109)  | 0.0569**<br>(0.0109)  |
| 50th Dummy                           | 0.0198*<br>(0.0089)   | 0.0210*<br>(0.0089)   |
| 75th Dummy                           | 0.0041<br>(0.0083)    | 0.0046<br>(0.0083)    |
| Severe Familiarity Percentage        | -0.4255**<br>(0.1146) | -0.4231**<br>(0.1156) |
| Average Team Familiarity             | -0.0470**<br>(0.0142) | -0.0435**<br>(0.0141) |
| Average Team Familiarity x Severe    |                       | -0.0277*<br>(0.0124)  |
| Individual Average Direct Experience | -0.0463**<br>(0.0146) | -0.0474**<br>(0.0145) |
| Team Size                            | 0.0463**<br>(0.0065)  | 0.0470**<br>(0.0066)  |
| Severe                               | 0.0242*<br>(0.0098)   | 0.1576**<br>(0.0600)  |
| Mild                                 | -0.0117+<br>(0.0060)  | -0.0113+<br>(0.0060)  |
| Constant                             | 5.3196**<br>(0.0822)  | 5.3028**<br>(0.0824)  |
| Observations (N)                     | 6129                  | 6129                  |
| Adjusted R <sup>2</sup>              | 0.479                 | 0.480                 |
| BIC                                  | -1523.859             | -1526.135             |
| AIC                                  | -1745.7201            | -1754.719             |
| Quarter Fixed Effect                 | Yes                   | Yes                   |
| Lead Surgeon Fixed Effect            | Yes                   | Yes                   |
| Procedure Fixed Effect               | Yes                   | Yes                   |
| Day of the Week Fixed Effect         | Yes                   | Yes                   |

+, \* and \*\* denote significance at 10%, 5% and 1% levels respectively

**Table S5. Regression of Team Familiarity on Surgery Duration using nine dummy variables for Bottleneck-Pair**

| Variable                    | Duration             |                      |
|-----------------------------|----------------------|----------------------|
|                             | Model: (1)           | (2)                  |
| Team Familiarity Dispersion | 0.0002**<br>(0.0000) | 0.0002**<br>(0.0000) |
| 10th Dummy                  | 0.0802**<br>(0.0151) | 0.0815**<br>(0.0151) |
| 20th Dummy                  | 0.0724**             | 0.0735**             |

|                                      |           |           |
|--------------------------------------|-----------|-----------|
|                                      | (0.0157)  | (0.0157)  |
| 30th Dummy                           | 0.0608**  | 0.0605**  |
|                                      | (0.0178)  | (0.0178)  |
| 40th Dummy                           | 0.0441*   | 0.0448*   |
|                                      | (0.0186)  | (0.0184)  |
| 50th Dummy                           | 0.0342+   | 0.0344+   |
|                                      | (0.0192)  | (0.0192)  |
| 60th Dummy                           | 0.0214    | 0.0210    |
|                                      | (0.0185)  | (0.0185)  |
| 70th Dummy                           | 0.0163    | 0.0159    |
|                                      | (0.0177)  | (0.0176)  |
| 80th Dummy                           | 0.0101    | 0.0101    |
|                                      | (0.0173)  | (0.0173)  |
| 90th Dummy                           | 0.0095    | 0.0094    |
|                                      | (0.0179)  | (0.0179)  |
| Team Severe Familiarity Percentage   | -0.4282** | -0.4257** |
|                                      | (0.1193)  | (0.1192)  |
| Average Team Familiarity             | -0.0511** | -0.0476** |
|                                      | (0.0105)  | (0.0105)  |
| Average Team Familiarity x Severe    |           | -0.0282** |
|                                      |           | (0.0084)  |
| Individual Average Direct Experience | -0.0449** | -0.0460** |
|                                      | (0.0103)  | (0.0103)  |
| Team Size                            | 0.0494**  | 0.0502**  |
|                                      | (0.0047)  | (0.0047)  |
| Severe                               | 0.0232*   | 0.1591**  |
|                                      | (0.0098)  | (0.0415)  |
| Mild                                 | -0.0120+  | -0.0116+  |
|                                      | (0.0067)  | (0.0067)  |
| Constant                             | 5.401**   | 5.385**   |
|                                      | (0.0696)  | (0.0697)  |
| Observations (N)                     | 6129      | 6129      |
| Adjusted R <sup>2</sup>              | 0.480     | 0.481     |
| BIC                                  | -1529.113 | -1530.171 |
| AIC                                  | -1755.979 | -1756.412 |
| Quarter Fixed Effect                 | Yes       | Yes       |
| Lead Surgeon Fixed Effect            | Yes       | Yes       |
| Procedure Fixed Effect               | Yes       | Yes       |
| Day of the Week Fixed Effect         | Yes       | Yes       |

+, \* and \*\* denote significance at 10%, 5% and 1% levels respectively

**Table S6. Regression of Team Familiarity on Surgery Duration using distance from mean for Bottleneck-Pair**

| Variable | Duration   |     |
|----------|------------|-----|
|          | Model: (1) | (2) |

|                                      |                       |                       |
|--------------------------------------|-----------------------|-----------------------|
| Team Familiarity Dispersion          | 0.0001**<br>(0.0000)  | 0.0001**<br>(0.0000)  |
| Bottleneck-Pair                      | 0.0002**<br>(0.0000)  | 0.0002**<br>(0.0000)  |
| Severe Familiarity Percentage        | -0.2915**<br>(0.1112) | -0.2891**<br>(0.1122) |
| Average Team Familiarity             | -0.0385**<br>(0.0125) | -0.0347**<br>(0.0125) |
| Average Team Familiarity x Severe    |                       | -0.0275*<br>(0.0121)  |
| Individual Average Direct Experience | -0.0310+<br>(0.0159)  | -0.0440**<br>(0.0159) |
| Team Size                            | 0.0462**<br>(0.0061)  | 0.0469**<br>(0.0062)  |
| Severe                               | 0.0221*<br>(0.0097)   | 0.1544**<br>(0.0586)  |
| Mild                                 | -0.0112+<br>(0.0059)  | -0.0109+<br>(0.0059)  |
| Constant                             | 5.2331**<br>(0.0810)  | 5.2171**<br>(0.0814)  |
| Observations (N)                     | 6129                  | 6129                  |
| Adjusted R <sup>2</sup>              | 0.487                 | 0.488                 |
| BIC                                  | -1632.978             | -1635.268             |
| AIC                                  | -1841.393             | -1851.406             |
| Quarter Fixed Effect                 | Yes                   | Yes                   |
| Lead Surgeon Fixed Effect            | Yes                   | Yes                   |
| Procedure Fixed Effect               | Yes                   | Yes                   |
| Day of the Week Fixed Effect         | Yes                   | Yes                   |

+, \* and \*\* denote significance at 10%, 5% and 1% levels respectively

**Table S7. Regression of Team Familiarity on Surgery Duration after removing the first 24 months**

| Variable                          | Duration             |                      |
|-----------------------------------|----------------------|----------------------|
|                                   | Model: (1)           | (2)                  |
| Team Familiarity Dispersion       | 0.0002**<br>(0.0000) | 0.0002**<br>(0.0000) |
| Bottleneck-Pair                   | 0.0161**<br>(0.0041) | 0.0165**<br>(0.0041) |
| Severe Familiarity Percentage     | -0.2615*<br>(0.1117) | -0.2590*<br>(0.1122) |
| Average Team Familiarity          | -0.0425*<br>(0.0173) | -0.0396*<br>(0.0173) |
| Average Team Familiarity x Severe |                      | -0.0234*<br>(0.0096) |

|                                      |           |           |
|--------------------------------------|-----------|-----------|
| Individual Average Direct Experience | -0.0390*  | -0.0398*  |
|                                      | (0.0179)  | (0.0178)  |
| Team Size                            | 0.0418**  | 0.0425**  |
|                                      | (0.0074)  | (0.0074)  |
| Severe                               | 0.0217*   | 0.1117*   |
|                                      | (0.0108)  | (0.0471)  |
| Mild                                 | -0.0082   | -0.0077   |
|                                      | (0.0064)  | (0.0064)  |
| Constant                             | 5.3632**  | 5.3471**  |
|                                      | (0.1000)  | (0.1003)  |
| Observations (N)                     | 4460      | 4460      |
| Adjusted R <sup>2</sup>              | 0.466     | 0.467     |
| BIC                                  | -1430.825 | -1433.273 |
| AIC                                  | -1601.766 | -1605.823 |
| Quarter Fixed Effect                 | Yes       | Yes       |
| Lead Surgeon Fixed Effect            | Yes       | Yes       |
| Procedure Fixed Effect               | Yes       | Yes       |
| Day of the Week Fixed Effect         | Yes       | Yes       |

+, \* and \*\* denote significance at 10%, 5% and 1% levels respectively

**Table S8. Regression of Team Familiarity on Surgery Duration with alternative specification of task complexity**

| Variable                             | Duration   |
|--------------------------------------|------------|
|                                      | Model: (1) |
| Team Familiarity Dispersion          | 0.0002**   |
|                                      | (0.0000)   |
| Bottleneck-Pair                      | 0.0179**   |
|                                      | (0.0033)   |
| Team Severe Familiarity Percentage   | -0.4082**  |
|                                      | (0.1192)   |
| Average Team Familiarity             | -0.0265*   |
|                                      | (0.0128)   |
| Average Team Familiarity x Patient   | -0.0112*   |
|                                      | (0.0044)   |
| Individual Average Direct Experience | -0.0479**  |
|                                      | (0.0103)   |
| Team Size                            | 0.0467**   |
|                                      | (0.0046)   |
| Patient                              | 0.0705**   |
|                                      | (0.0221)   |
| Constant                             | 5.170**    |
|                                      | (0.0793)   |
| Observations (N)                     | 6128       |
| Adjusted R <sup>2</sup>              | 0.480      |

|                              |            |
|------------------------------|------------|
| BIC                          | -1521.1060 |
| AIC                          | -1742.9680 |
| Quarter Fixed Effect         | Yes        |
| Lead Surgeon Fixed Effect    | Yes        |
| Procedure Fixed Effect       | Yes        |
| Day of the Week Fixed Effect | Yes        |

+, \* and \*\* denote significance at 10%, 5% and 1% levels respectively

## References

- Gaynes, R. P., D. H. Culver, T. C. Horan, J. R. Edwards, C. Richards, J. S. Tolson, and the National Nosocomial Infections Surveillance System. 2001. Surgical site infections (SSI) rates in the United States, 1992-1998: The national nosocomial infections surveillance system basic SSI risk index. *Clinical Infectious Diseases*. **33**(Suppl 2) 69-77.
- Gibbons, C., J. Bruce, J. Carpenter, A. P. Wilson, J. Wilson, A. Pearson, D. L. Lamping, Z. H. Krukowski, B. C. Reeves. 2011. Identifications of risk factors by systematic review and development of risk-adjusted models for surgical site infection. *Health Technological Assessment*. **15**(30) 1-156.
- Pisano, G. P., R. M. J. Bohmer, A. C. Edmondson. 2001. Organizational differences in rates of learning: Evidence from the adoption of minimally invasive cardiac surgery. *Management Sci.* **47**(6) 752-768.
